# Supplementary material for: “I had to take a ‘dead year’ to undergo surgeries,” the Lived Experiences of University Students with Sickle Cell Disease, an interpretative phenomenological analysis
Source: Research Square preprint supplement (doi:10.21203/rs.3.rs-7300043/v1), 2025-08-26
Supplement: Supplementary file 1 [file 661288a7494c82485807381a.pdf]

**Navigating University Life with Sickle Cell Disease: A Qualitative Study.**  
in depth Interview Guide

1. For how long have you lived with sickle cell disease? What has the experience been like in living with sickle cell disease?

2. Tell me about your experience living with sickle cell disease as a university student.

Probe: what challenges do you face

Probe: how does the disease affect your class and examination attendance/absenteeism, academic success, general health and wellbeing, stigma etc?

3. How do you cope with the challenges you face in your educational journey as a university student?

Probe: Adherence to medication

Probe: Social support (friends and family)

Probe: caring for self (sleep, exercise, diet)

Probe: Academic coping – engaging in discussions. etc

4. What support systems do you, as a university student with sickle cell disease rely on to navigate their educational journey?

Probe: Counselling for students

Probe: Support from lecturers

5. How do you perceive the effectiveness of academic arrangements and support services provided to students with sickle cell disease?

Probe: Counseling for students

Probe: Support from lecturers

Probe: What happens with Examination absenteeism ?

6. Which specific academic and social facilities have you found to be most beneficial for you, as a university student with sickle cell disease?

Probe: what support would you like but is currently unavailable?

Probe: How best do you think a student with sickle cell disease can be supported?

7. How have you been supported by the university staff in Makerere University, as a student with Sickle Cell Disease?

8. Do you have any other suggestions that you would like us to capture?
